# Supplementary material for: Genotypic Tannin Levels in Populus tremula Impact the Way Nitrogen Enrichment Affects Growth and Allocation Responses for Some Traits and Not for Others
Source: PLoS One. 2015 Oct 21;10(10):e0140971. doi: 10.1371/journal.pone.0140971 (PMC4619582; doi:10.1371/journal.pone.0140971)
Supplement: S1 Data — The complete set of raw data collected for the study: “Genotypic tannin levels in Populus tremula impact the way nitrogen enrichment affects growth and allocation responses for some traits and not for others”. (XLSX) [file pone.0140971.s001.xlsx]

## Sheet: raw_data_experiment
tree_ID	block	genotype	treatment (1=ambient N; 2=deposition; 3=fertilization)	tannin_group (1=low; 2=high)	GT_by_treat_code	Tgr_by_treat_code	total_leaf_area_sqcm	leaf_number	avg_leaf_area_sqcm	initial_height_cm	final_height_cm	height_increment_cm_per_day	dry_weight_leaves_g	dry_weight_stems_g	dry_weight_roots_g	root_to_shoot_ratio	total_biomass_g	initial_diameter_mm	initial_biomass_g	biomass_increment_g_per_day	CTs_mg_per_g	lignin_leaves_%	lignin_stems_%	lignin_roots_%	lignin_entire_plant_%	C_leaves_%	C_stems_%	C_roots_%	C_entire_plant_%	N_leaves_%	N_stems_%	N_roots_%	N_entire_plant_%	C_to_N_ratio_leaves	C_to_N_ratio_stems	C_to_N_ratio_roots	C_to_N_ratio_entire_plant		#NULL!=missing data
5	2	5	2	2	52	22	1122.97	59	19.0334	50	83	0.66	7.26	7.09	10.81	0.75331	25.16	4.92	6	0.38	84.5036	12.8042	24.6655	16.6554	17.8025	48.73	47.29	46.49	47.366	1	0.31	0.43	0.560745	48.73	152.548	108.116	84.4697
8	2	5	2	2	52	22	689.97	29	23.7921	30.5	64	0.67	4.55	4.24	5.83	0.663254	14.62	4.01	3.48	0.22	65.7383	14.8886	6.10434	48.0903	25.5774	47.88	48.15	46.63	47.4487	1.22	0.19	0.26	0.538183	39.2459	253.421	179.346	88.1645
9	3	5	3	2	53	23	1581.61	35	45.1889	40.5	112	1.43	10.53	13.96	11.73	0.478971	36.22	3.86	3.87	0.65	23.7414	5.40954	41.44	23.7821	25.2463	47.94	47.71	46.55	47.3986	2.11	0.68	0.59	1.06648	22.7204	70.1618	78.8983	44.4442
10	3	18	1	1	181	11	1373.58	38	36.1468	78.5	106.5	0.56	10.02	10.72	14.01	0.675506	34.75	4.25	7.03	0.55	59.4346	22.333	15.8812	14.2534	17.0852	47.04	48.14	46.87	47.3107	0.84	0.27	0.17	0.394039	56	178.296	275.706	120.066
13	3	65	3	2	653	23	#NULL!	43	#NULL!	47	107	1.2	#NULL!	11.72	13.57	#NULL!	#NULL!	4.38	4.92	#NULL!	58.2346	6.60063	5.60805	23.3255	#NULL!	47.86	47.22	46.58	#NULL!	2.04	0.65	0.53	#NULL!	23.4608	72.6462	87.8868	#NULL!
19	3	26	2	2	262	22	644.54	56	11.5096	40	72	0.64	4.63	4.89	7.45	0.782563	16.97	3.13	3.13	#NULL!	41.6431	0.942947	8.03987	23.6729	12.9667	46.42	47.57	42.86	45.1926	1.36	0.17	0.26	0.534304	34.1324	279.824	164.846	84.5822
21	2	26	1	2	261	21	1681.91	45	37.3758	78.5	112	0.67	11.02	11.97	16.8	0.730753	39.79	5.82	11.07	#NULL!	83.7202	13.9457	9.4791	39.6435	23.4515	47.03	48.5	59.49	52.7313	1.01	0.51	0.35	0.580885	46.5644	95.098	169.971	90.7775
22	2	26	3	2	263	23	2478.69	54	45.9017	71.5	151	1.59	17.47	17.72	18.2	0.517192	53.39	5	8.02	0.91	24.639	16.179	32.9039	17.4892	22.1764	49.21	46.71	50.63	48.8638	2.14	0.5	0.42	1.00934	22.9953	93.42	120.548	48.4117
23	3	26	3	2	263	23	2127.23	50	42.5446	72	138	1.32	15.22	17.42	19.75	0.605086	52.39	5.47	9.31	0.86	26.3264	8.73467	3.92068	19.7523	11.2877	49.63	47.68	45.87	47.566	1.82	0.53	0.47	0.882212	27.2692	89.9623	97.5957	53.9168
24	3	65	2	2	652	22	532.68	29	18.3683	30.5	58	0.55	3.4	3.58	5.82	0.833811	12.8	3.43	3.01	0.2	53.1537	11.5635	7.59321	53.748	29.6329	46.07	49.09	45.93	46.8473	1.29	0.42	0.27	0.582788	35.7132	116.881	170.111	80.3848
25	3	18	3	1	183	13	2421.05	91	26.6049	73.5	133	1.19	16.74	18.39	16.7	0.475377	51.83	4.95	8.35	0.87	23.7844	12.2583	8.73467	13.2211	11.3192	50.36	47.12	46.43	47.9477	1.95	0.6	0.47	0.994273	25.8256	78.5333	98.7872	48.2239
26	3	65	2	2	652	22	1214.26	37	32.8178	55	93	0.76	8.12	9.33	15.77	0.903725	33.22	5.43	7.44	0.52	106.878	11.2161	2.33255	25.2313	15.3739	47.03	48.01	46.91	47.2465	1.18	0.2	0.23	0.45374	39.8559	240.05	203.957	104.127
27	2	18	3	1	183	13	2590.59	88	29.4385	72	142	1.4	18.17	19.29	15.7	0.419114	53.16	4.62	7.44	0.91	39.8207	15.9308	10.2732	13.8365	13.2584	49.4	46.59	46.3	47.4618	1.77	0.6	0.57	0.990938	27.9096	77.65	81.2281	47.8959
28	1	65	3	2	653	23	2141.75	48	44.6198	70.5	133	1.25	13.28	18.13	16.9	0.538045	48.31	5.97	10.56	0.75	77.3165	15.5338	4.61548	12.9035	10.5148	48.73	47.43	43.59	46.4398	1.5	0.61	0.78	0.913994	32.4867	77.7541	55.8846	50.8098
30	3	115	1	1	1151	11	804.03	27	29.7789	40.5	63	0.45	5.62	6.23	13.83	1.16709	25.68	4.42	4.88	0.42	36.7209	9.33021	48.8844	31.2661	30.7415	45.89	48.39	46.69	46.936	1.13	0.34	0.19	0.43232	40.6106	142.324	245.737	108.568
32	2	60	1	1	601	11	1553.65	40	38.8413	63.5	116	1.05	9.37	9.25	11.17	0.599893	29.79	4.04	5.72	0.48	33.9366	8.98281	20.6952	7.28551	11.9843	47.86	47.79	46.74	47.4241	0.91	0.25	0.3	0.476451	52.5934	191.16	155.8	99.5362
36	3	51	2	2	512	22	2059.01	46	44.7611	84	131	0.94	10.73	14.12	18.28	0.735614	43.13	5.75	11.49	0.63	53.4846	3.52364	30.9187	9.28059	14.9323	46.57	49	46	47.1243	1.13	0.49	0.2	0.526318	41.2124	100	230	89.5358
37	2	115	1	1	1151	11	1014.17	26	39.0065	49.5	74	0.49	6.62	7.03	14.57	1.0674	28.22	4.57	5.71	0.45	20.1825	20.993	7.79172	13.9556	14.0721	45.61	48.3	45.91	46.4375	0.97	0.45	0.15	0.417148	47.0206	107.333	306.067	111.322
38	2	115	1	1	1151	11	842.42	26	32.4008	43	73	0.6	5.8	7.49	12.52	0.942062	25.81	4.51	5.17	0.41	29.8602	15.3849	26.3033	13.4593	17.622	47.36	48.49	46.58	47.3179	1.2	0.41	0.52	0.641098	39.4667	118.268	89.5769	73.8075
39	3	115	2	1	1152	12	941.19	25	37.6476	47.5	71	0.47	6.58	7.03	13.04	0.958119	26.65	4.39	5.31	0.43	42.1701	8.83393	9.33021	13.3005	11.1495	47.67	48.22	46.19	47.0863	1.24	0.25	0.27	0.504102	38.4435	192.88	171.074	93.4063
41	3	51	3	2	513	23	2269.25	51	44.4951	77	141.5	1.29	13.91	20.66	18.56	0.536882	53.13	5.63	10.31	0.86	28.1084	15.236	26.1047	17.2212	20.1546	48.21	47.07	46.52	47.1722	2.18	0.58	0.37	0.92535	22.1147	81.1552	125.73	50.9777
43	3	51	3	2	513	23	2628.78	39	67.4046	36.5	125	1.77	15.54	16.86	14.09	0.434877	46.49	3.84	3.64	0.86	23.8928	17.916	9.37984	19.9011	15.423	48.16	46.64	46.05	46.9722	1.59	0.57	0.41	0.862555	30.2893	81.8246	112.317	54.457
44	3	60	3	1	603	13	2549.84	51	49.9969	76	149.5	1.47	14.84	17.69	17.8	0.547187	50.33	4.81	8.2	0.84	16.9175	8.23838	5.95546	19.0575	11.2628	48.77	49.02	47.5	48.4117	1.81	0.49	0.47	0.872244	26.9448	100.041	101.064	55.5024
46	2	60	1	1	601	11	1363.21	39	34.9541	73	118	0.9	8.66	8.26	10.63	0.628251	27.55	5.02	8.48	0.38	25.4583	6.65026	6.30286	14.1938	9.45598	46.94	48.98	47.15	47.6273	0.89	0.42	0.51	0.602363	52.7416	116.619	92.451	79.0674
47	3	60	1	1	601	11	1103.47	41	26.9139	71	119	0.96	6.8	8.13	10.59	0.70931	25.52	4.28	6.63	0.38	26.2313	14.1442	33.3506	21.2411	23.2068	47.45	47.92	46.96	47.393	0.79	0.24	0.26	0.394794	60.0633	199.667	180.615	120.045
48	2	65	3	2	653	23	2102.05	69	30.4645	47	111	1.28	14.7	15.07	14.89	0.500168	44.66	4.71	5.41	0.79	65.7665	16.576	12.2087	48.7156	25.8161	48.04	46.94	48.43	47.7937	1.91	0.44	0.64	0.990332	25.1518	106.682	75.6719	48.2603
49	2	72	3	2	723	23	2297.18	43	53.4228	73.5	133	1.19	16.56	20.21	18.82	0.51183	55.59	6.32	12.04	0.87	31.8724	15.2857	5.90583	30.1247	16.8981	48.25	51.48	47.07	49.0209	2.37	0.64	0.43	1.08407	20.3586	80.4375	109.465	45.2192
50	2	51	1	2	511	21	579.83	34	17.0538	38	76.5	0.77	3.27	4.42	5.26	0.684005	12.95	3.48	3.37	0.19	61.6522	4.26808	17.2708	37.7675	22.3114	47.88	47.4	46.36	47.0832	1.23	0.27	0.23	0.495761	38.9268	175.556	201.565	94.9715
52	2	26	3	2	263	23	2329.18	131	17.78	62	142	1.6	15.49	18.38	14.13	0.417183	48	4.23	5.64	0.85	52.3482	23.8715	19.4545	11.3154	18.4817	48.14	47.78	45.95	47.3531	1.78	0.44	0.24	0.813391	27.0449	108.591	191.458	58.2168
54	1	23	1	1	231	11	1361.73	79	17.2371	51	81.5	0.61	7.25	8.69	12.44	0.780427	28.38	5.44	7.34	0.42	78.0899	4.06956	14.6901	22.73	15.5007	48.13	47.76	46.71	47.3893	1.11	0.26	0.23	0.463877	43.3604	183.692	203.087	102.159
56	2	51	2	2	512	22	1696.97	43	39.4644	71.5	119.5	0.96	9.31	11.51	17.09	0.820845	37.91	5.32	8.85	0.58	71.1685	5.70731	24.3181	19.6927	17.6629	47.97	47.84	46.15	47.1137	1.29	0.26	0.21	0.490506	37.186	184	219.762	96.0511
58	2	65	1	2	651	21	1078.85	41	26.3134	44.5	84	0.79	7.63	7.23	11.08	0.745626	25.94	4.31	4.65	0.43	96.7149	11.5139	17.4693	33.1123	22.3996	47.1	48.62	47.09	47.5203	0.96	0.44	0.35	0.554528	49.0625	110.5	134.543	85.6949
59	1	65	1	2	651	21	1047.49	45	23.2776	48	73	0.5	6.85	6.16	10.17	0.781706	23.18	4.94	5.86	0.35	108.809	6.2036	32.0106	46.5518	30.7653	47.34	47.76	46.43	47.0616	1	0.28	0.17	0.444704	47.34	170.571	273.118	105.827
61	1	115	2	1	1152	12	799.33	27	29.6048	47.5	64	0.33	5.26	6.58	13.49	1.13936	25.33	5.42	6.95	0.37	29.2629	10.1243	6.65026	15.6331	12.1551	46.97	48.67	46.01	46.8977	1.32	0.34	0.54	0.649945	35.5833	143.147	85.2037	72.1564
62	3	115	3	1	1153	13	2160.27	32	67.5084	58.5	91	0.65	11.19	15.76	24.61	0.913173	51.56	5.47	8.17	0.87	14.769	10.8191	17.9656	15.3254	15.1542	47.36	47.99	46.67	47.2221	2.14	0.44	0.61	0.890042	22.1308	109.068	76.5082	53.0561
64	2	115	3	1	1153	13	1351.84	33	40.9648	48.5	80	0.63	9.9	12.52	22.09	0.985281	44.51	5.75	7.67	0.74	7.05895	4.76436	7.84135	11.4146	8.93083	48.05	48.91	46.28	47.4183	2.89	0.36	0.66	1.0719	16.6263	135.861	70.1212	44.2374
66	2	115	2	1	1152	12	1348.23	28	48.1511	61.5	86.5	0.5	8.72	10.84	23.49	1.20092	43.05	6.37	10.73	0.65	31.2268	6.2036	22.2337	14.3526	14.6858	46.22	48.46	46.68	47.0299	1.33	0.1	0.25	0.430842	34.7519	484.6	186.72	109.158
67	2	115	3	1	1153	13	1447.88	33	43.8752	59	90	0.62	10.49	14.84	22.77	0.898934	48.1	5.19	7.62	0.81	16.1607	7.49395	2.9281	14.5313	9.41731	48.32	48.28	46.9	47.6395	2.77	0.53	0.53	1.01875	17.444	91.0943	88.4906	46.7628
70	2	72	3	2	723	23	1130.25	39	28.9808	43.5	108.5	1.3	7.71	8.35	6.74	0.419676	22.8	3.99	4.18	0.37	12.7557	5.65768	15.6827	22.9285	14.435	48.08	49.46	45.82	47.9205	3	0.53	0.74	1.42753	16.0267	93.3208	61.9189	33.5689
72	3	115	3	1	1153	13	1207.17	32	37.7241	61	80	0.38	8.65	11.84	21.03	1.02635	41.52	5.24	7.91	0.67	5.34523	13.0027	16.8738	8.93318	12.046	47.91	47.7	45.68	46.7227	2.5	0.69	0.67	1.05706	19.164	69.1304	68.1791	44.2005
73	2	72	1	2	721	21	773.7	77	10.0481	49	65.5	0.33	5.85	5.98	7.86	0.664413	19.69	4.2	4.79	0.3	70.2129	20.596	37.2216	28.4869	28.7959	44.97	48.35	46.89	46.7644	1.11	0.45	0.32	0.59423	40.5135	107.444	146.531	78.6974
76	1	26	1	2	261	21	1043.32	36	28.9811	62.5	92	0.59	6.46	7.61	11.41	0.810945	25.48	4.85	6.91	0.37	95.0589	7.39469	3.72216	43.8719	22.6319	47.42	48.95	46.75	47.574	1.12	0.07	0.17	0.38092	42.3393	699.286	275	124.892
77	3	72	3	2	723	23	1503.82	89	16.8969	44.5	111	1.33	14.16	13.6	12.96	0.466859	40.72	3.88	4.1	0.73	77.2927	3.6229	6.99766	25.2114	11.621	48.46	48.52	46.87	47.9739	1.93	0.39	0.44	0.941432	25.1088	124.41	106.523	50.9585
80	1	72	1	2	721	21	781.6	27	28.9481	63.5	79	0.31	5.67	6.03	8.78	0.750427	20.48	4.27	5.81	0.29	84.222	9.92576	28.7351	25.807	22.2731	46.6	47.41	46.64	46.8593	1.34	0.35	0.23	0.572746	34.7761	135.457	202.783	81.8151
82	1	115	1	1	1151	11	1238.8	33	37.5394	53.5	84	0.61	8.38	10.83	19.98	1.04008	39.19	5.21	7.15	0.64	36.1002	3.72216	37.7179	32.3083	27.6911	47.16	48.21	46.32	47.0278	1.42	0.34	0.24	0.520132	33.2113	141.794	193	90.4151
83	1	115	1	1	1151	11	865.74	26	33.2977	56.5	78.5	0.44	5.69	7.9	16.31	1.20015	29.9	5.72	8.51	0.43	40.162	17.2212	39.1571	6.25323	17.0337	45.53	48.31	43.91	45.3796	1.27	0.28	0.91	0.81202	35.8504	172.536	48.2527	55.8849
84	1	5	1	2	51	21	1347.04	36	37.4178	60.5	92.5	0.64	8.55	10.07	11.47	0.616004	30.09	5.7	8.64	0.43	78.4173	15.4842	20.3478	18.4619	18.2477	47.07	47.37	45.72	46.658	0.92	0.4	0.21	0.475374	51.163	118.425	217.714	98.1501
85	3	72	3	2	723	23	2171.85	61	35.6041	88	131	0.86	15.62	20.19	16.68	0.465792	52.49	5.82	12.2	0.81	37.7369	14.7894	26.9981	18.3031	20.603	48.3	48.91	47.22	48.195	1.93	0.35	0.5	0.867984	25.0259	139.743	94.44	55.5252
88	1	18	1	1	181	11	1973.6	40	49.34	106.5	122	0.31	13	14.03	15.21	0.562708	42.24	6.85	19.31	0.46	117.698	18.8093	14.7398	26.3529	20.1736	48.15	47.88	46.95	47.6273	0.65	0.2	0.12	0.309676	74.0769	239.4	391.25	153.797
89	1	60	1	1	601	11	823.99	34	24.235	61	87	0.52	5.16	4.85	8.43	0.842158	18.44	4.1	5.68	0.26	54.067	13.3501	13.8464	22.8789	17.8351	46.65	47.92	46.58	46.946	0.79	0.24	0.45	0.489806	59.0506	199.667	103.511	95.8462
90	2	5	1	2	51	21	967.2	28	34.5429	57	77	0.4	6.3	6.85	9.13	0.694297	22.28	6.01	8.97	0.27	72.798	14.9383	25.7573	20.4868	20.5381	45.82	48.25	46.7	46.9271	0.84	0.06	0.22	0.34611	54.5476	804.167	212.273	135.584
91	1	72	2	2	722	22	1102.82	38	29.0216	52.5	84.5	0.64	7.9	7.25	11.79	0.778218	26.94	4.5	5.48	0.43	42.8279	16.0797	21.1915	25.6581	21.6454	45.38	47.22	45.13	45.7604	1.49	0.35	0.38	0.697252	30.4564	134.914	118.763	65.6297
92	1	72	3	2	723	23	1990.14	40	49.7535	51	134	1.66	13.71	13.83	12.46	0.452433	40	5.04	6.3	0.67	31.2797	10.9183	8.53615	16.6753	11.8879	48.07	47.51	48.33	47.957	2.21	0.5	0.5	1.08608	21.7511	95.02	96.66	44.1559
93	2	72	2	2	722	22	749.95	27	27.7759	61.5	70	0.17	4.86	5	8.75	0.887424	18.61	4.71	6.54	0.24	129.443	8.13912	9.77687	38.4722	22.8429	46.05	49.62	46.54	47.2498	0.94	0.42	0.41	0.551305	48.9894	118.143	113.512	85.7053
97	3	72	1	2	721	21	610.39	18	33.9106	43.5	59	0.31	3.89	3.17	5.57	0.788952	12.63	3.71	3.85	0.18	147.926	9.33021	19.9011	18.8589	16.1827	46.65	47.94	46.98	47.1044	0.89	0.46	0.28	0.512772	52.4157	104.217	167.786	91.8623
99	1	5	3	2	53	23	2040.2	55	37.0945	47.5	120	1.45	12.99	19.31	13.91	0.43065	46.21	4.62	5.31	0.82	28.6889	12.4568	1.63775	12.9035	8.07155	48.15	48.49	43.87	47.0087	1.9	0.37	0.63	0.878557	25.3421	131.054	69.6349	53.5068
101	2	60	3	1	603	13	2364.5	43	54.9884	60	164	2.08	15.63	20.23	13.75	0.383436	49.61	3.91	5.31	0.89	15.6034	15.4346	34.3431	22.3727	25.0686	47.94	47.4	38.12	44.9997	1.61	0.57	0.41	0.853369	29.7764	83.1579	92.9756	52.7318
102	3	5	2	2	52	22	1331.24	39	34.1344	59.5	95.5	0.72	8.41	9.51	13.19	0.736049	31.11	5.7	8.53	0.45	74.4057	1.0422	49.0829	15.3849	21.8087	46.35	47.69	47.01	47.0374	1.02	0.3	0.2	0.452196	45.4412	158.967	235.05	104.02
103	1	51	3	2	513	23	2476.65	48	51.5969	79	145	1.32	14.87	19.18	22.68	0.666079	56.73	6.15	12.23	0.89	35.4389	15.9805	9.87613	11.762	12.2313	49.26	47.37	45.57	47.1493	2.19	0.35	0.65	0.952391	22.4932	135.343	70.1077	49.5062
105	1	51	1	2	511	21	1260.39	37	34.0646	67	102	0.7	6.41	8.18	11.86	0.812886	26.45	4.88	7.35	0.38	92.8119	16.0301	9.67762	28.2388	19.5381	47.96	49.96	45.75	47.5826	0.98	0.41	0.35	0.521131	48.9388	121.854	130.714	91.3065
107	2	65	1	2	651	21	962.58	30	32.086	53	65	0.24	6.02	4.96	9.5	0.865209	20.48	5.24	6.86	0.27	95.1146	5.21102	33.698	14.0747	16.221	45.29	48.28	46.64	46.6332	0.72	0.27	0.21	0.374329	62.9028	178.815	222.095	124.578
111	2	51	3	2	513	23	2101.95	45	46.71	58	133	1.5	12.84	16.63	15.97	0.541907	45.44	4.78	6.4	0.78	30.1015	19.1567	12.0102	17.3502	15.9056	48.75	48.1	46.73	47.8002	2.1	0.42	0.51	0.926265	23.2143	114.524	91.6275	51.6054
112	1	51	1	2	511	21	1283.49	46	27.902	54.5	102.5	0.96	6.96	8.09	11.8	0.784053	26.85	4.41	5.47	0.43	75.5962	20.8937	10.5709	23.5737	18.9586	47.11	47.59	47.89	47.5915	1.01	0.27	0.45	0.540801	46.6436	176.259	106.422	88.0019
113	2	60	2	1	602	12	1610.94	43	37.4637	74.5	126.5	1.04	9.28	11.09	14.46	0.709867	34.83	4.65	7.69	0.54	33.1358	5.26065	6.40212	23.8615	13.3469	47.73	47.58	47.07	47.4126	1.14	0.15	0.35	0.49691	41.8684	317.2	134.486	95.415
114	2	5	3	2	53	23	2798.81	46	60.8437	77	148	1.42	18.37	29.32	24.22	0.507863	71.91	6.87	14.49	1.15	39.414	15.3353	5.31028	18.1443	12.1939	48.91	47.96	47.2	47.9469	1.56	0.27	0.54	0.690486	31.3526	177.63	87.4074	69.4393
115	3	60	1	1	601	11	1185.45	41	28.9134	62	114	1.04	7.6	8.82	11.63	0.708283	28.05	3.83	5.29	0.46	25.494	3.82142	17.0872	22.3826	15.6882	46.89	47.84	48.85	47.9981	1.1	0.07	0.21	0.407043	42.6273	683.429	232.619	117.919
116	3	115	1	1	1151	11	958.07	30	31.9357	54.5	76	0.43	6.6	8.43	16.5	1.0978	31.53	5.38	7.58	0.48	26.1755	37.2712	42.3334	15.8316	27.402	47.25	47.92	46.51	47.0381	1.48	0.34	0.16	0.484314	31.9257	140.941	290.688	97.1231
117	2	115	2	1	1152	12	726.05	17	42.7088	19	43	0.48	4.73	3.56	7.03	0.84801	15.32	1.91	2.4	0.26	25.4599	16.6753	22.0352	12.6256	16.0633	46.55	48.92	46.1	46.8964	1.03	0.49	0.26	0.55123	45.1942	99.8367	177.308	85.076
120	3	5	3	2	53	23	1813.29	41	44.2266	51	127	1.52	12.44	17.61	13.66	0.454576	43.71	5.17	6.53	0.74	18.4506	10.422	1.73701	18.9781	9.59724	48.86	47.04	46.36	47.3472	2.43	0.63	0.63	1.14237	20.107	74.6667	73.5873	41.4464
121	1	60	3	1	603	13	1991.93	46	43.3028	53.5	138	1.69	12.61	14.38	12.69	0.470174	39.68	3.79	4.8	0.7	9.05884	16.3279	16.973	17.7671	17.0218	49.77	47.2	45.36	47.4278	2.3	0.49	0.38	1.03	21.6391	96.3265	119.368	46.0463
123	1	50	3	1	503	13	1815.38	77	23.5764	54	121	1.34	10.72	11.28	13.05	0.593182	35.05	4.65	6.17	0.58	19.5569	18.9582	10.9183	36.4772	22.8922	48.64	47.55	47.24	47.7645	2.32	0.44	0.45	1.01855	20.9655	108.068	104.978	46.8944
124	3	50	3	1	503	13	1986.52	73	27.2126	58.5	128	1.39	12.63	14.92	16.09	0.584029	43.64	4.98	7.14	0.73	42.9839	14.8886	13.1516	14.0946	14.0014	49.29	48.22	46.79	48.0004	2.05	0.4	0.55	0.932753	24.0439	120.55	85.0727	51.461
125	1	26	3	2	263	23	2020.38	95	21.2672	61.5	137	1.51	13.86	18.08	15.14	0.474014	47.08	4.59	6.3	0.82	28.095	22.2337	9.03244	16.0797	15.1853	49.73	47.82	47.76	48.3636	2.22	0.5	0.4	0.974225	22.4009	95.64	119.4	49.6432
126	1	65	3	2	653	23	1870.24	56	33.3971	37	109.5	1.45	12.05	12.7	12.11	0.489293	36.86	4.04	3.87	0.66	63.9157	11.9605	3.6229	50.5221	21.7568	47.41	48.82	46.26	47.5176	1.98	0.4	0.62	0.988786	23.9444	122.05	74.6129	48.0565
130	1	26	3	2	263	23	2366.07	59	40.1029	78.5	154.5	1.52	16.18	20.1	22.42	0.617971	58.7	5.38	9.72	0.98	50.3385	14.1938	10.968	23.2759	16.5577	49.23	47.92	46.91	47.8941	1.88	0.44	0.45	0.840694	26.1862	108.909	104.244	56.9698
131	1	115	3	1	1153	13	1431.78	33	43.3873	58.5	83	0.49	10.4	13	24.77	1.05855	48.17	5.46	8.15	0.8	11.1628	20.596	0.545917	19.5041	14.6223	47.68	43.45	46.36	45.8569	2.49	0.42	0.73	1.02618	19.1486	103.452	63.5068	44.6869
132	3	115	2	1	1152	12	804.69	26	30.9496	38.5	63	0.49	6.28	7.21	12.23	0.906597	25.72	3.54	3.82	0.44	35.8975	2.38218	12.0598	12.7546	10.0272	46.39	47.51	46.04	46.5373	1.5	0.38	0.22	0.577381	30.9267	125.026	209.273	80.6008
136	1	18	2	1	182	12	1043.46	52	20.0665	61.5	99	0.75	6.78	7.44	10.21	0.718003	24.43	4.53	6.5	0.36	78.8875	18.8589	6.79915	43.3259	25.4124	48.54	47.5	46.55	47.3934	1.18	0.28	0.19	0.492205	41.1356	169.643	245	96.288
139	3	5	2	2	52	22	709.61	33	21.5033	35	79	0.88	5.14	6.07	7.25	0.646744	18.46	3.72	3.45	0.3	55.4386	1.68738	17.2708	23.2263	15.2704	47.24	47.26	46.69	47.0217	1.21	0.37	0.23	0.54868	39.0413	127.73	203	85.6998
141	1	5	2	2	52	22	1628.09	36	45.2247	70.5	94.5	0.48	9.53	9.49	12.85	0.675605	31.87	6.19	11.22	0.41	77.9152	8.23838	1.98515	10.6206	7.3356	46.59	48.12	79	60.1063	0.86	0.04	4.66	2.14786	54.1744	1203	16.9528	27.9843
144	2	72	2	2	722	22	896.66	23	38.9852	48	61	0.26	6.84	6.05	7.6	0.589604	20.49	3.8	4.19	0.33	83.6421	33.0528	6.8984	31.6433	24.8051	46.24	47.31	47.02	46.8419	1.06	0.35	0.32	0.575809	43.6226	135.171	146.938	81.3497
145	3	18	1	1	181	11	1610.99	38	42.3945	84	115	0.62	11.5	11.81	14.06	0.603175	37.37	4.77	8.72	0.57	82.1466	6.50137	10.968	16.4768	11.6668	47.52	47.5	45	46.5712	0.78	0.29	0.22	0.414546	60.9231	163.793	204.545	112.343
148	3	18	2	1	182	12	2195.4	41	53.5463	82.5	119.5	0.74	12.17	13.1	15.34	0.607044	40.61	5.24	9.94	0.61	72.0188	16.0301	20.0004	18.5612	18.2678	48.15	47.63	46.32	47.2937	0.89	0.11	0.2	0.377798	54.1011	433	231.6	125.183
150	3	50	1	1	501	11	1506.48	34	44.3082	65.5	111	0.91	8.54	10.86	15.82	0.815464	35.22	5.05	7.9	0.55	54.2581	16.2782	5.31028	21.9359	15.4364	48.18	47.4	47.13	47.4643	0.91	0.34	0.21	0.419752	52.9451	139.412	224.429	113.077
151	2	5	1	2	51	21	1125.07	28	40.1811	61	79.5	0.37	6.84	7.44	10.04	0.703081	24.32	5.62	8.51	0.32	64.1375	12.8539	21.8367	13.7174	15.9582	45.46	47.143	48.05	47.0434	0.66	0.51	0.23	0.436585	68.8788	92.4373	208.913	107.753
152	1	5	3	2	53	23	1957.67	42	46.6112	58	124	1.32	13.34	19.11	18.27	0.56302	50.72	5.23	7.32	0.87	38.3904	13.3005	17.2708	25.1618	19.0686	49.52	47.91	46.67	47.8852	1.84	0.5	0.43	0.827163	26.913	95.82	108.535	57.8909
154	2	65	3	2	653	23	2036.62	50	40.7324	54.5	129	1.49	13.5	17.89	16.46	0.524371	47.85	5.13	6.78	0.82	55.0241	14.6405	2.63033	19.117	11.6911	48.7	47.29	47.1	47.6261	2.03	0.41	0.67	0.956642	23.9901	115.341	70.2985	49.7846
155	1	65	2	2	652	22	798.29	29	27.5272	48.5	73.5	0.5	4.97	5.02	10.11	1.01201	20.1	5.2	6.35	0.27	68.9186	24.0203	11.6131	18.0153	17.8986	44.22	47.81	36.1	41.0277	0.77	0.27	0.3	0.40864	57.4286	177.074	120.333	100.401
156	1	72	2	2	722	22	675.79	35	19.3083	49	64	0.3	4.68	4.78	6.66	0.704017	16.12	4.61	5.41	0.21	72.2454	9.18133	6.10434	11.6628	9.29175	46.22	48.41	46.71	47.0598	1.38	0.53	0.54	0.780547	33.4928	91.3396	86.5	60.2908
157	3	65	1	2	651	21	1205.18	37	32.5724	61	94	0.66	8.06	9	12.79	0.749707	29.85	5.33	7.83	0.44	130.118	13.499	8.83393	18.1641	14.0902	47.35	48.13	46.66	47.2854	0.88	0.31	0.2	0.4167	53.8068	155.258	233.3	113.476
158	1	65	2	2	652	22	370.56	24	15.44	19.5	47	0.55	2.58	1.86	3.77	0.849099	8.21	2.48	2.18	0.12	81.8199	9.72724	14.0946	33.5491	21.6499	48.15	47.25	46.97	47.3762	1.4	0.49	0.29	0.683313	34.3929	96.4286	161.966	69.333
159	3	65	1	2	651	21	1082.55	52	20.8183	58	81	0.46	7.83	8.67	15.5	0.939394	32	5.73	8.43	0.47	125.557	9.8265	13.5487	20.3974	15.955	47.19	48.32	46.65	47.2334	1.04	0.29	0.16	0.410521	45.375	166.621	291.562	115.057
163	3	72	2	2	722	22	954.9	38	25.1289	68.5	91	0.45	6.62	8.42	12.62	0.839096	27.66	5.43	8.83	0.38	79.0162	9.92576	6.79915	20.4272	13.7658	47.3	47.76	46.72	47.1776	1.34	0.36	0.28	0.55811	35.2985	132.667	166.857	84.531
166	1	5	2	2	52	22	1230.88	35	35.168	57.5	92	0.69	7.95	10.31	11.75	0.643483	30.01	5.5	7.85	0.44	76.5691	16.6753	39.8023	25.7077	28.1585	47.12	48.21	46.56	47.2789	1	0.3	0.2	0.446363	47.12	160.7	232.8	105.92
167	2	51	3	2	513	23	2575.16	51	50.4933	69.5	151	1.63	15.14	21.14	17.82	0.49118	54.1	4.98	7.8	0.93	29.23	11.6131	19.3056	15.5239	15.9082	48.68	47.64	46.43	47.5366	2.05	0.28	3.02	1.67804	23.7463	170.143	15.3742	28.3286
168	2	60	3	1	603	13	2541.37	47	54.0717	52	146	1.88	14.23	15.93	12.32	0.408488	42.48	3.63	4.52	0.76	9.68767	3.9703	27.6432	20.1294	17.534	47.47	49.56	47.54	48.2732	1.84	0.43	0.68	0.974794	25.7989	115.256	69.9118	49.5214
170	1	60	1	1	601	11	1147.74	56	20.4954	63	118	1.1	7.47	8.29	10.33	0.655457	26.09	4.37	6.29	0.4	26.7617	11.1169	8.83393	16.4768	12.5157	46.51	47.81	42.93	45.5144	0.63	0.46	0.39	0.481077	73.8254	103.935	110.077	94.6094
171	3	5	1	2	51	21	818.36	26	31.4754	51.5	78	0.53	5.56	6.98	9.66	0.770335	22.2	4.99	6.25	0.32	87.3307	18.0649	25.5092	19.653	21.1003	47.94	48.13	46.42	47.3484	0.71	0.27	0.16	0.332482	67.5211	178.259	290.125	142.409
172	1	51	2	2	512	22	1220.47	43	28.383	67	104	0.74	6.34	8.77	12.42	0.821972	27.53	4.81	7.19	0.41	69.4013	19.7523	10.2732	14.839	14.5173	47.92	47.64	42.38	45.3345	0.94	0.22	0.34	0.440009	50.9787	216.545	124.647	103.031
174	1	51	3	2	513	23	2538.91	80	31.7364	47	124	1.54	15.28	16.91	15.31	0.475614	47.5	4.18	4.63	0.86	23.0221	12.1591	7.29543	14.7894	11.2746	49.18	47.2	46.66	47.6596	1.77	0.53	0.39	0.883646	27.7853	89.0566	119.641	53.9352
176	1	60	2	1	602	12	1389.89	44	31.5884	78.5	120.5	0.84	8.75	10.21	13.99	0.737869	32.95	4.89	8.61	0.49	45.5398	16.8738	17.9656	10.7198	14.5973	45.15	48.57	54.12	50.013	0.75	0.41	0.46	0.52143	60.2	118.463	117.652	95.915
178	1	51	2	2	512	22	982.14	57	17.2305	44	104	1.2	5.17	6.48	8.92	0.765665	20.57	3.42	3.56	0.34	50.0493	22.2833	20.0997	12.0102	17.1386	47.03	47.31	45.01	46.2381	1.13	0.31	0.4	0.555024	41.6195	152.613	112.525	83.3083
179	3	65	3	2	653	23	1962.11	61	32.1657	42.5	116.5	1.48	12.6	14.33	14.89	0.552915	41.82	4.53	4.81	0.74	48.5192	11.5139	4.86362	11.7124	9.30537	47.86	47.96	46.87	47.54	2.07	0.53	0.54	0.997473	23.1208	90.4906	86.7963	47.6604
181	3	60	2	1	602	12	1190.52	40	29.763	64.5	127	1.25	7.65	10.25	13.27	0.741341	31.17	4.67	6.99	0.48	24.2512	16.973	0.446659	19.0575	12.4238	47.2	47.58	47.39	47.4001	1.19	0.17	0.3	0.475537	39.6639	279.882	157.967	99.677
184	2	60	2	1	602	12	1250.23	41	30.4934	56	128	1.44	7.36	8.94	9.97	0.611656	26.27	3.54	4.57	0.43	21.7182	11.7124	22.333	19.514	18.2866	47.63	48.28	46.67	47.483	1.15	0.43	0.59	0.692351	41.4174	112.279	79.1017	68.5823
186	3	50	2	1	502	12	1581.21	38	41.6108	85	116	0.62	9.14	11.58	17.21	0.830598	37.93	6.53	14.6	0.47	41.4336	6.74952	14.5412	17.1716	13.8579	47.84	47.77	46.92	47.4069	1.27	0.32	0.22	0.5037	37.6693	149.281	213.273	94.1174
187	2	50	3	1	503	13	1567.24	31	50.5561	28	114	1.72	8.99	8.88	6.98	0.390599	24.85	2.24	2.65	0.44	21.4039	7.99024	21.1915	16.6554	15.1413	48.25	54.48	46.6	50.0112	2.34	0.41	0.67	1.18117	20.6197	132.878	69.5522	42.3404
189	2	50	2	1	502	12	1310.96	32	40.9675	73	101	0.56	6.95	9.34	14.88	0.913444	31.17	5.74	10.42	0.42	64.256	20.596	8.53615	16.1194	14.8422	46.8	47.9	47	47.2182	1.22	0.51	0.3	0.56788	38.3607	93.9216	156.667	83.1482
190	1	50	1	1	501	11	#NULL!	40	#NULL!	86	113	0.54	#NULL!	13.65	20.6	#NULL!	#NULL!	6.85	16.01	#NULL!	62.8032	9.77687	8.33764	20.0997	#NULL!	47.24	48.36	46.86	#NULL!	1.27	0.28	0.43	#NULL!	37.1969	172.714	108.977	#NULL!
191	3	50	2	1	502	12	721.09	31	23.261	49.5	74	0.49	4.11	5.35	9.43	0.996829	18.89	4.68	5.89	#NULL!	47.0988	11.0672	3.02736	15.3849	10.9437	46.7	47.2	46.79	46.8786	1.04	0.2	0.27	0.417531	44.9038	236	173.296	112.276
193	2	50	3	1	503	13	2443.14	41	59.5888	90	148	1.16	15.26	20.1	20.07	0.56759	55.43	6.52	15.29	#NULL!	27.4183	24.6655	18.7101	35.6335	26.4782	49.31	47.97	47.58	48.1996	2.06	0.44	0.54	0.922278	23.9369	109.023	88.1111	52.2615
194	3	50	1	1	501	11	1294.4	35	36.9829	71.5	111	0.79	7.41	10.27	16.09	0.910068	33.77	5.98	10.94	0.46	68.1595	4.51622	30.3728	18.9086	19.2375	46.89	49.31	46.94	47.6556	1.12	0.41	0.21	0.470639	41.8661	120.268	223.524	101.257
195	3	60	3	1	603	13	2730.03	57	47.8953	84	171	1.74	17.04	21.6	17.61	0.455745	56.25	5.71	11.56	0.89	21.7887	14.4916	44.9637	16.179	26.7211	48.96	47.3	47.41	47.8371	1.56	0.51	0.44	0.806158	31.3846	92.7451	107.75	59.3396
197	1	50	1	1	501	11	1402.53	39	35.9623	82	106.5	0.49	7.41	11.72	18.12	0.947203	37.25	6.38	13.62	0.47	76.9702	5.95546	8.23838	21.0426	14.0133	46.9	47.75	45.5	46.4907	1.26	0.29	0.45	0.560905	37.2222	164.655	101.111	82.8852
198	1	50	2	1	502	12	1409.25	37	38.0878	81	104	0.46	7.47	11.51	19.32	1.01791	38.3	6.03	12.27	0.52	71.9717	14.6901	10.422	30.621	21.4424	46.98	47.41	46.18	46.7019	1.31	0.31	0.22	0.459536	35.8626	152.935	209.909	101.629
199	3	50	3	1	503	13	2178.43	64	34.038	52	130	1.56	13.6	14.74	18.12	0.639379	46.46	4.51	5.8	0.81	26.8365	13.102	33.5987	22.8888	23.423	48.64	47.94	46.95	47.7631	1.76	0.37	0.46	0.812145	27.6364	129.568	102.065	58.8111
201	2	50	1	1	501	11	1758.48	35	50.2423	89	119	0.6	8.79	12.1	18.2	0.87123	39.09	6.54	15.23	0.48	84.6995	26.8492	8.13912	14.9283	15.5106	48.37	49.21	46.78	47.8954	1.2	0.46	0.27	0.53808	40.3083	106.978	173.259	89.0118
202	2	50	2	1	502	12	1968.37	40	49.2092	83	123.5	0.81	11.02	13.87	18.55	0.745279	43.44	5.85	11.91	0.63	52.5123	17.7671	4.06956	23.7623	15.953	47.81	48.07	46.73	47.43	1.4	0.08	0.46	0.577079	34.15	600.875	101.587	82.1898
204	2	5	3	2	53	23	2069.49	43	48.1277	53	126	1.46	13.7	19.8	15.54	0.463881	49.04	4.91	6.23	0.86	28.7326	27.7425	5.26065	13.7373	14.2295	48.97	47.21	47.32	47.7402	1.83	0.56	0.43	0.873735	26.7596	84.3036	110.047	54.6393
205	1	23	1	1	231	11	1469.8	58	25.3414	62.5	90.5	0.56	7.57	8.82	15.04	0.917633	31.43	5.67	9.06	0.45	59.6112	15.3353	13.2509	8.83393	11.6409	47.73	45.96	46.42	46.6113	0.78	0.28	0.38	0.448358	61.1923	164.143	122.158	103.96
207	3	26	3	2	263	23	2560.18	70	36.574	75.5	160	1.69	18.53	20.57	18.52	0.473657	57.62	5.06	8.53	0.98	48.3614	14.0946	4.81399	25.9261	14.5846	48.9	47.62	46.7	47.737	1.83	0.48	0.43	0.898116	26.7213	99.2083	108.605	53.1524
208	1	18	3	1	183	13	2337.86	53	44.1106	81.5	153	1.43	15.66	19.44	17.93	0.510826	53.03	5.66	11.12	0.84	36.3934	14.8886	35.1868	38.0653	30.1655	51.08	47.84	46.68	48.4032	1.72	0.42	0.45	0.813994	29.6977	113.905	103.733	59.4639
209	1	50	2	1	502	12	1737.31	37	46.9543	85.5	114	0.57	8.79	12.64	20.09	0.937471	41.52	6.58	14.87	0.53	77.0652	15.0375	1.43924	35.7327	20.9131	47.72	47.55	47.38	47.509	1.02	0.07	0.21	0.338974	46.7843	679.286	225.619	140.155
210	3	23	3	1	233	13	2566.74	95	27.0183	63	115	1.04	15.24	15.55	19.36	0.628776	50.15	5.67	9.12	0.82	22.7969	22.9781	5.21	12.1591	13.2939	49.69	45.92	46.8	47.4091	2.12	0.58	0.37	0.96708	23.4387	79.1724	126.486	49.023
212	3	26	1	2	261	21	1490.46	42	35.4871	70	116.5	0.93	9.47	11.18	14.67	0.710412	35.32	4.9	7.65	0.55	50.4239	11.0176	8.03987	27.1966	16.7945	47.24	48.5	47.2	47.6206	1.03	0.11	0.17	0.381556	45.8641	440.909	277.647	124.806
214	1	65	1	2	651	21	774.53	53	14.6138	41.5	71	0.59	5.1	5.66	9.56	0.888476	20.32	4.37	4.53	0.32	61.8383	15.9308	11.5139	39.2068	25.6489	47.53	47.87	46.88	47.3121	1.49	0.34	0.25	0.586075	31.8993	140.794	187.52	80.727
216	2	18	2	1	182	12	968	41	23.6098	63	100	0.74	6.63	7.26	10.37	0.74658	24.26	4.26	6.09	0.36	66.336	18.2634	7.14655	11.4742	12.0368	47.27	48.18	45.74	46.8942	1.05	0.06	0.33	0.446098	45.019	803	138.606	105.121
217	3	26	2	2	262	22	950.23	109	8.71771	48	83	0.7	6.41	6.2	10.49	0.831879	23.1	4.02	4.47	0.37	40.8629	15.5834	13.499	19.2063	16.6659	46.12	47.12	46.15	46.3922	1.29	0.36	0.28	0.58146	35.7519	130.889	164.821	79.7856
218	1	18	1	1	181	11	1019.78	51	19.9957	65	101	0.72	7.09	9.02	11.17	0.693358	27.28	4.81	7.33	0.4	66.3605	16.973	2.18367	14.442	11.0477	48.33	48.11	36.31	43.3387	1.07	0.49	0.38	0.595769	45.1682	98.1837	95.5526	72.7441
222	3	51	2	2	512	22	839.3	31	27.0742	42	87	0.9	4.37	4.87	6.93	0.75	16.17	3.9	3.99	0.24	46.0922	9.77687	12.2087	17.3105	13.7369	46.35	47.18	46.13	46.5006	1.19	0.29	0.25	0.515955	38.9496	162.69	184.52	90.1253
225	1	26	2	2	262	22	988.07	42	23.5255	57.5	91	0.67	6.92	8.71	10.46	0.669226	26.09	4.04	5.04	0.42	51.1279	4.71474	1.93552	22.0352	10.7303	47.05	47.94	46.56	47.1431	1.26	0.31	0.49	0.633938	37.3413	154.645	95.0204	74.3656
227	2	51	2	2	512	22	723.77	31	23.3474	51	80.5	0.59	4.04	5.42	6.37	0.673362	15.83	3.7	4.2	0.23	61.3386	9.33021	2.5807	27.544	14.3487	46.91	47.66	47.57	47.4335	1.21	0.09	0.28	0.452323	38.7686	529.556	169.893	104.867
232	2	50	1	1	501	11	1202.62	28	42.9507	54.5	86	0.63	6.19	6.5	12.23	0.963751	24.92	4.27	5.58	0.39	52.093	5.5088	15.1864	21.9756	16.1155	47.18	48.03	47.17	47.4054	1.17	0.43	0.29	0.545317	40.3248	111.698	162.655	86.9318
233	3	23	1	1	231	11	886.9	34	26.0853	29	58.5	0.59	4.59	4.45	6.66	0.736726	15.7	3.45	3.35	0.25	47.3614	6.60063	25.7573	34.5416	23.8815	47.12	47.61	46.49	46.9803	1.09	0.31	0.34	0.550502	43.2294	153.581	136.735	85.3409
234	2	23	2	1	232	12	#NULL!	39	#NULL!	59.5	99	0.79	#NULL!	10.38	16	#NULL!	#NULL!	5.02	7.31	#NULL!	47.3651	10.025	16.3279	26.4025	#NULL!	49.35	47.29	46.69	#NULL!	1.19	0.39	0.24	#NULL!	41.4706	121.256	194.542	#NULL!
236	2	23	2	1	232	12	1139.85	63	18.0929	41	81	0.8	6.15	6.08	9.47	0.774325	21.7	3.72	4.11	#NULL!	44.1656	7.49395	9.67762	27.3157	16.7572	47.83	48.16	47.1	47.6107	1.36	0.13	0.39	0.592254	35.1691	370.462	120.769	80.389
237	2	23	1	1	231	11	1087.59	41	26.5266	43	65	0.44	5.24	4.75	8.01	0.801802	18	4.6	5.29	#NULL!	63.2641	7.79172	36.9735	16.4768	19.3566	47.6	47.73	46.94	47.3366	1.05	0.25	0.21	0.465001	45.3333	190.92	223.524	101.799
238	2	23	3	1	233	13	2609.19	128	20.3843	32	90	1.16	14.63	12.07	11.62	0.435206	38.32	3.8	3.75	0.69	20.0843	31.7128	10.6702	18.4024	21.0512	48.99	47.22	46.84	47.7845	2.32	0.51	0.55	1.21335	21.1164	92.5882	85.1636	39.3823
242	1	18	3	1	183	13	2363.81	51	46.3492	78.5	153.5	1.5	16.49	20.07	18.35	0.501915	54.91	5.45	10.17	0.89	24.3415	12.705	25.2611	57.0235	32.1043	49.78	47.27	46.75	47.8478	1.57	0.5	0.47	0.811237	31.707	94.54	99.4681	58.9813
243	2	18	1	1	181	11	962.96	35	27.5131	60	103.5	0.87	7.1	8.2	9.3	0.607843	24.6	4.09	5.61	0.38	46.0105	16.179	4.86362	18.0153	13.1025	47.39	47.92	46.21	47.1237	1.03	0.1	0.2	0.406288	46.0097	479.2	231.05	115.986
246	2	26	2	2	262	22	1158.6	64	18.1031	61	101	0.8	7.65	9.08	12.41	0.741781	29.14	4.36	5.82	0.47	48.632	13.8961	18.8589	23.7623	19.6432	47.66	47.5	47.1	47.3679	1.35	0.43	0.31	0.620311	35.3037	110.465	151.935	76.3614
248	1	23	3	1	233	13	1491.06	87	17.1386	20	63	0.86	8.19	6.48	6.88	0.468984	21.55	2.87	2.73	0.38	17.3342	15.6827	3.17624	48.0903	22.2673	48.31	46.65	46.66	47.2807	2.54	0.75	0.6	1.38222	19.0197	62.2	77.7667	34.2064
249	3	18	3	1	183	13	2327.6	49	47.502	71	149	1.56	15.86	16.56	16.26	0.501542	48.68	4.77	7.71	0.82	24.1206	2.33255	7.49395	16.5264	8.82945	50.55	47.17	46.49	48.046	1.98	0.53	0.4	0.959067	25.5303	89	116.225	50.0967
252	2	26	2	2	262	22	1004.67	54	18.605	58.5	98.5	0.8	6.96	7.88	10.21	0.688005	25.05	5.03	6.94	0.36	30.5311	28.6854	4.26808	21.4396	18.051	47.18	47.53	45.54	46.6214	1.41	0.22	0.25	0.562855	33.461	216.045	182.16	82.8302
253	2	51	1	2	511	21	1700.23	44	38.6416	71	115	0.88	8.86	10.47	14.7	0.760476	34.03	5.24	8.59	0.51	67.6026	13.0027	8.4369	14.9482	12.4378	47.94	47.06	45.55	46.6349	1.04	0.28	0.23	0.456231	46.0962	168.071	198.043	102.218
254	1	26	1	2	261	21	1204.01	77	15.6365	72	106	0.68	8.39	10.43	13.89	0.738045	32.71	4.63	7.16	0.51	63.7172	12.2583	28.5366	2.63033	13.3597	46.87	49.99	39.33	44.6603	1.17	0.45	0.54	0.672826	40.0598	111.089	72.8333	66.3772
258	2	23	1	1	231	11	1301.79	71	18.3351	54	82	0.56	7.31	7.4	11.99	0.815092	26.7	5.16	7.1	0.39	58.1988	36.8246	2.43181	15.9606	17.9175	47.21	47.57	46.41	46.9432	1.17	0.16	0.5	0.58902	40.3504	297.312	92.82	79.6971
260	3	26	1	2	261	21	1216.09	41	29.6607	77.5	91	0.27	6.79	7.9	13.62	0.927161	28.31	5.5	9.97	0.37	72.2874	23.8715	32.0602	17.6182	23.1513	45.8	47.42	47.29	46.9751	0.96	0.44	0.13	0.415708	47.7083	107.773	363.769	113
262	2	18	3	1	183	13	2525.92	86	29.3712	75	141	1.32	17.49	17.75	15.42	0.437571	50.66	4.87	8.27	0.85	22.9866	11.9109	8.28801	11.1963	10.4244	49.47	46.9	46.67	47.7187	1.91	0.53	0.49	0.994316	25.9005	88.4906	95.2449	47.9915
263	1	26	2	2	262	22	738.81	77	9.59494	39.5	68	0.57	4.89	5.01	6.18	0.624242	16.08	3.57	3.52	0.25	77.4335	13.7968	2.63033	61.1923	28.5349	47.88	48.55	46.49	47.5607	1.38	0.49	0.32	0.695496	34.6957	99.0816	145.281	68.3839
265	3	60	2	1	602	12	1399.51	45	31.1002	81.5	133	1.03	8.62	11.64	13.86	0.684107	34.12	4.74	8.45	0.51	23.23	11.6628	28.338	14.4916	18.4995	46.37	47.77	47	47.0991	1.13	0.31	0.24	0.488621	41.0354	154.097	195.833	96.392
267	1	60	2	1	602	12	1142.06	44	25.9559	71.5	110	0.77	6.93	7.35	10.19	0.713585	24.47	4.45	7.02	0.35	52.1857	1.0422	22.333	23.4248	16.7579	47.92	46.73	47.04	47.1896	1.02	0.3	0.26	0.487111	46.9804	155.767	180.923	96.8764
269	2	18	2	1	182	12	1146.54	44	26.0577	83	112	0.58	7.51	8.85	12.07	0.737775	28.43	5.31	10.2	0.36	73.3603	15.1368	11.0176	14.2931	13.4946	47.01	49.52	46.03	47.3698	0.85	0.41	0.29	0.475184	55.3059	120.78	158.724	99.6873
270	1	5	1	2	51	21	1106.09	36	30.7247	55.5	91	0.71	7.16	9.9	10.63	0.623095	27.69	5.5	7.64	0.4	68.8337	15.9805	11.7124	11.0672	12.5664	47.69	47.36	46.68	47.1786	1.01	0.33	0.37	0.521068	47.2178	143.515	126.162	90.5421
271	1	18	2	1	182	12	1058.95	40	26.4738	70.5	101	0.61	6.59	7.24	10.87	0.785973	24.7	4.74	7.6	0.34	71.5351	6.50137	11.3154	19.1567	13.4831	49.08	47.28	59.56	53.174	1.04	0.29	0.45	0.560717	47.1923	163.034	132.356	94.8322
272	3	18	2	1	182	12	814.74	36	22.6317	63.5	93	0.59	5.62	6.16	10.33	0.87691	22.11	4.4	6.38	0.31	50.7517	12.6553	24.467	17.8664	18.3832	48.46	48.32	46.1	47.3275	1.24	0.37	0.21	0.516619	39.0806	130.595	219.524	91.61
274	3	72	1	2	721	21	1003.23	27	37.1567	70.5	89	0.37	6.73	8.41	14.41	0.951783	29.55	6.06	10.83	0.37	135.854	16.2782	9.03244	22.6506	17.3211	47.2	48.34	46.27	47.0639	0.9	0.1	0.25	0.355214	52.4444	483.4	185.08	132.495
276	1	72	1	2	721	21	1179.31	30	39.3103	73.5	92.5	0.38	8.25	9.5	14.08	0.793239	31.83	5.14	8.56	0.47	97.5558	17.519	16.973	23.0774	19.8127	46.92	47.42	46.58	46.9132	1.26	0.05	0.23	0.443092	37.2381	948.4	202.522	105.877
278	1	60	3	1	603	13	2456.68	50	49.1336	77.5	158	1.61	15.15	20.06	18.31	0.520023	53.52	4.54	7.65	0.92	13.2462	16.9234	19.3552	24.4174	20.3984	48.14	47.66	47.22	47.6446	1.82	0.49	0.47	0.859613	26.4505	97.2653	100.468	55.4256
279	1	72	3	2	723	23	1847.28	46	40.1583	80	152	1.44	13.6	17.13	15.42	0.50179	46.15	5.45	10.08	0.72	38.0116	18.5115	6.45174	23.7722	15.7943	47.93	49.52	46.21	47.9491	2.1	0.39	0.75	1.01437	22.8238	126.974	61.6133	47.27
281	2	72	1	2	721	21	1129.49	32	35.2966	74.5	87	0.25	7.7	8.65	12.09	0.73945	28.44	6.01	11.19	0.35	114.212	12.3079	9.97539	17.4098	13.7675	46.81	47.4	47.1	47.1134	0.69	0.41	0.25	0.417802	67.8406	115.61	188.4	112.765
284	3	51	1	2	511	21	956.05	42	22.7631	48	91	0.86	5.74	6.81	10.52	0.838247	23.07	4.3	4.87	0.36	69.5202	12.1591	10.2732	31.1867	20.2806	47.24	46.88	46.41	46.7614	1.08	0.27	0.23	0.453434	43.7407	173.63	201.783	103.127
286	1	23	3	1	233	13	2577.41	143	18.0238	48.5	102	1.07	14.77	14.91	16.71	0.563005	46.39	4.86	6.1	0.81	19.893	13.7968	10.1739	42.2837	22.8927	49.33	47.1	46.74	47.6772	2.35	0.55	0.37	1.05811	20.9915	85.6364	126.324	45.0588
287	1	115	2	1	1152	12	1212.62	20	60.631	67	68	0.02	7.09	8.18	19.24	1.25999	34.51	5.4	8.87	0.51	52.6637	1.14146	7.89098	45.9563	27.7265	45.66	48.74	46.55	46.8892	1.16	0.29	0.19	0.413063	39.3621	168.069	245	113.516
289	1	50	3	1	503	13	2022.42	86	23.5165	47	97	1	12.15	12.71	15.07	0.606195	39.93	4.06	4.82	0.7	45.6785	10.6206	2.77921	29.7277	15.3365	48.01	48.73	47.31	47.9781	1.93	0.4	0.39	0.861904	24.8756	121.825	121.308	55.6653
290	3	72	2	2	722	22	729.27	33	22.0991	63.5	78	0.29	5.49	6.98	10.2	0.817963	22.67	5.06	7.45	0.3	101.686	7.74209	9.87613	22.1344	14.8746	46.22	47.99	45.88	46.6109	1.2	0.3	0.29	0.513426	38.5167	159.967	158.207	90.7841
292	1	115	3	1	1153	13	1363.87	34	40.1138	63.5	88	0.49	9.04	12.55	23.66	1.09588	45.25	5.81	9.52	0.71	14.593	3.9703	20.1989	22.4818	18.1502	47.72	48.77	46.19	47.2076	2.55	0.54	0.74	1.04593	18.7137	90.3148	62.4189	45.1343
294	3	51	1	2	511	21	801.67	29	27.6438	46	79	0.66	4.05	4.46	8.35	0.981199	16.86	3.96	4.28	0.25	50.0602	7.74209	37.0231	26.9484	25.0002	46.06	47.38	45.8	46.2826	1.01	0.23	0.2	0.402557	45.604	206	229	114.972
296	2	23	3	1	233	13	2797.44	148	18.9016	54.5	106	1.03	16.22	15.87	19.05	0.593643	51.14	5.13	7.09	0.88	46.7219	15.5338	5.65768	18.6604	13.6322	50.01	54.27	47.04	50.221	2.17	0.77	0.41	1.07973	23.0461	70.4805	114.732	46.5125
299	3	5	1	2	51	21	1038.43	32	32.4509	64	88	0.48	7.02	8.72	12.86	0.817027	28.6	5.13	7.66	0.42	79.7314	7.09692	1.38961	15.9805	9.35148	46.32	48.39	46.39	46.9839	0.99	0.47	0.16	0.458272	46.7879	102.957	289.938	102.524
303	3	23	2	1	232	12	1741.65	95	18.3332	60.5	94	0.67	9.23	9.9	18.68	0.976477	37.81	5.79	9.13	0.57	47.4491	6.45174	13.7968	11.6628	10.9496	47.82	47.21	45.83	46.6786	1.31	0.33	0.44	0.623619	36.5038	143.061	104.159	74.8511
304	1	23	2	1	232	12	744.02	53	14.0381	38.5	65.5	0.54	4.04	4.21	7.42	0.899394	15.67	3.98	4.26	0.23	35.8632	15.2857	14.839	38.4623	26.1389	47.46	47.2	46.07	46.7279	1.4	0.33	0.26	0.572598	33.9	143.03	177.192	81.6067
306	1	23	2	1	232	12	1105.94	39	28.3574	51.5	75	0.47	5.57	6.07	10.45	0.897766	22.09	5.26	7.06	0.3	53.5271	18.2634	16.0301	40.5964	28.2115	48.61	47.16	46.87	47.3801	1.18	0.35	0.18	0.478662	41.1949	134.743	260.389	98.9844
307	3	23	1	1	231	11	1085.68	74	14.6714	38.5	71	0.65	6.26	6.56	9.83	0.766771	22.65	4.12	4.41	0.36	34.1323	2.43181	25.7077	20.6654	17.0869	47.01	47.61	45.95	46.733	1.35	0.27	0.26	0.564417	34.8222	176.333	176.731	82.7988
310	3	23	3	1	233	13	2073.86	97	21.38	43.5	102.5	1.18	12	13.25	14.6	0.578218	39.85	4.27	4.89	0.7	16.2444	14.8886	8.28801	28.209	17.5739	48.77	46.65	45.95	47.0311	2.22	0.62	0.57	1.08345	21.9685	75.2419	80.614	43.4086
315	3	23	2	1	232	12	1444.91	121	11.9414	50.5	88.5	0.76	8.01	8.43	15.37	0.934915	31.81	5.15	6.76	0.5	37.8477	4.41696	36.4275	19.1071	19.9977	47.82	48.7	47.14	47.7201	1.32	0.34	0.24	0.538328	36.2273	143.235	196.417	88.6451
318	2	18	1	1	181	11	929.85	32	29.0578	53.5	85.5	0.64	6.14	5.9	7.49	0.622093	19.53	4.5	5.88	0.27	88.3674	13.3501	6.99766	20.9632	14.3525	47.44	47.52	44.92	46.5038	0.91	0.31	0.21	0.460398	52.1319	153.29	213.905	101.008
322	2	26	1	2	261	21	568.2	27	21.0444	32	61.5	0.59	3.56	3.25	4.36	0.640235	11.17	2.76	2.61	0.17	93.8245	20.0997	37.0231	23.5241	26.3686	48.63	49.83	47.38	48.5113	1.02	0.67	0.23	0.610225	47.6765	74.3731	206	79.4975
323	2	65	2	2	652	22	1658.99	51	32.5292	56	102	0.92	11.22	11.39	15.72	0.695268	38.33	5.32	7.31	0.62	123.691	12.3576	10.8191	18.0252	14.2264	47.68	48.59	47.21	47.7637	1.01	0.31	0.55	0.613462	47.2079	156.742	85.8364	77.8593
324	2	65	2	2	652	22	1142.13	53	21.5496	38.5	87	0.97	7.67	7.51	10.23	0.673913	25.41	3.57	3.48	0.44	119.109	6.2036	6.30286	14.1541	9.43431	47.91	48.93	46.65	47.7081	1.04	0.37	0.56	0.648819	46.0673	132.243	83.3036	73.5308
